# Supplementary material for: Water-soluble pH neutral triazatruxene-based small molecules as hole injection materials for solution-processable organic light-emitting diodes
Source: Royal Society of Chemistry journal article supplement (doi:10.1039/c9tc02125f), 2019-01-01
Supplement: c9tc02125f1.pdf [file c9tc02125f1.pdf]

Electronic Supplementary Information (ESI)

**Water-soluble pH neutral triazatruxene-based small molecules as  
hole injection materials for solution-processable organic light-  
emitting diodes**

Yonghong Chen,<sup>ab</sup> Xiaofu Wu,<sup>a</sup> Yang Liu,<sup>ac</sup> Liang Chen,<sup>ac</sup> Yuxiang Xu,<sup>ab</sup> Hua Li,<sup>ac</sup> Weijie Wang,<sup>ac</sup> Shumeng Wang,<sup>a</sup> Hongkun Tian,<sup>ac</sup> Hui Tong\*<sup>ac</sup> and Lixiang Wang\*<sup>ac</sup>

<sup>a</sup> State Key Laboratory of Polymer Physics and Chemistry, Changchun Institute of Applied Chemistry, Chinese Academy of Sciences, Changchun 130022, P. R. China.

E-mail: chemtonghui@ciac.ac.cn, lixiang@ciac.ac.cn.

<sup>b</sup> University of Chinese Academy of Sciences, Beijing 100049, P. R. China.

<sup>c</sup> University of Science and Technology of China, Hefei 230026, P. R. China.

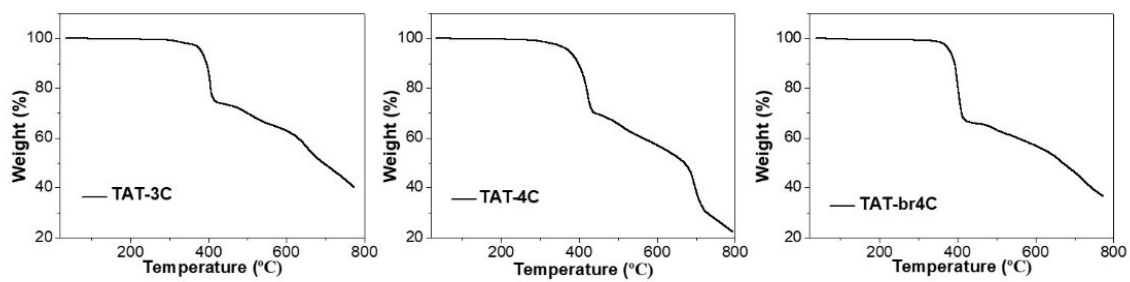

Fig. S1. The thermogravimetric thermograms of TAT-3C, TAT-4C and TAT-br4C.

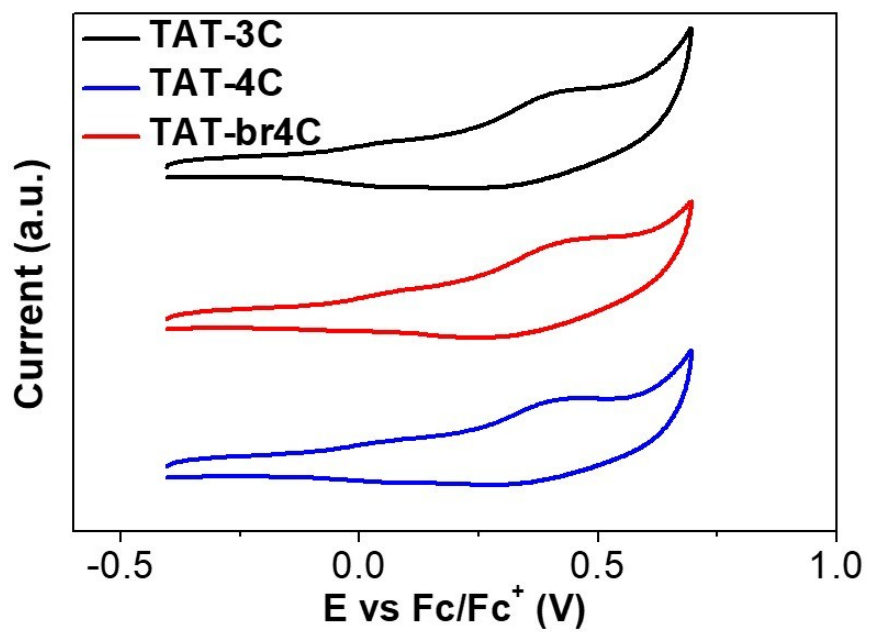

Fig. S2. Cyclic voltammetry analysis of TAT-3C, TAT-4C and TAT-br4C.

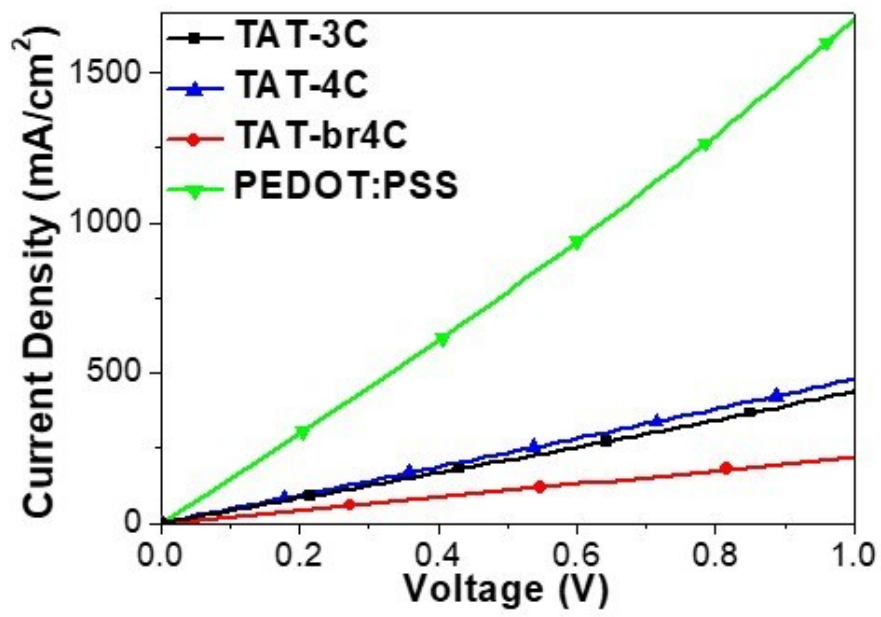

Fig. S3. The film conductivities of TAT-3C, TAT-4C, TAT-br4C and PEDOT:PSS.

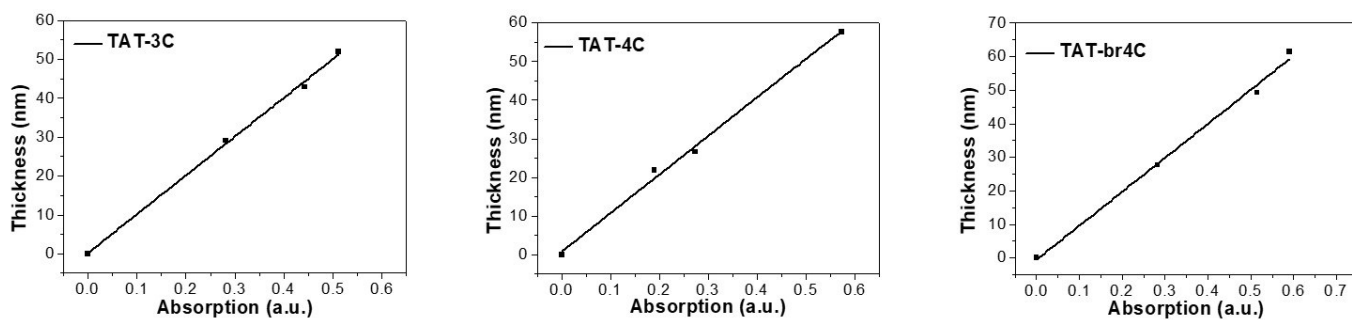

Fig. S4. The linear relationship of thickness versus absorption.

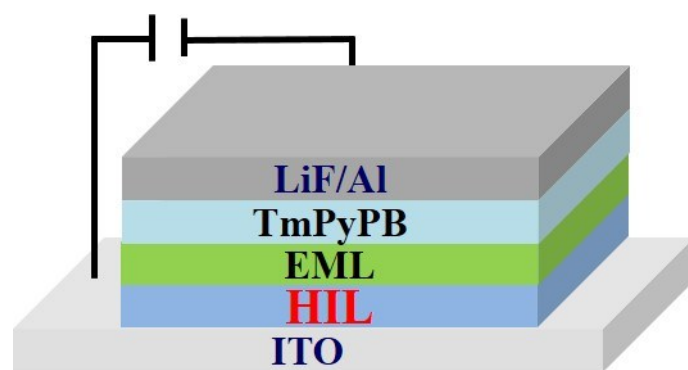

Fig. S5. Structure of OLED devices based on TAT-3C, TAT-4C and TAT-br4C.

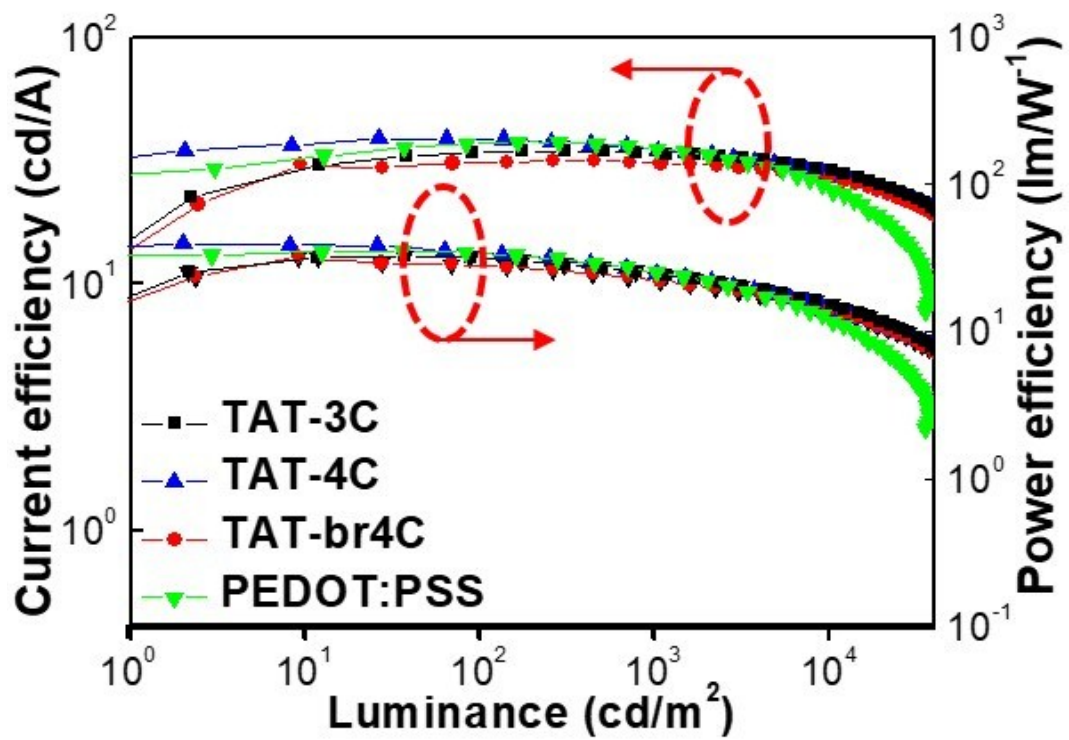

Fig. S6. Current efficiency-luminance-power efficiency curves of the devices based on the hole injection layers.

(A)

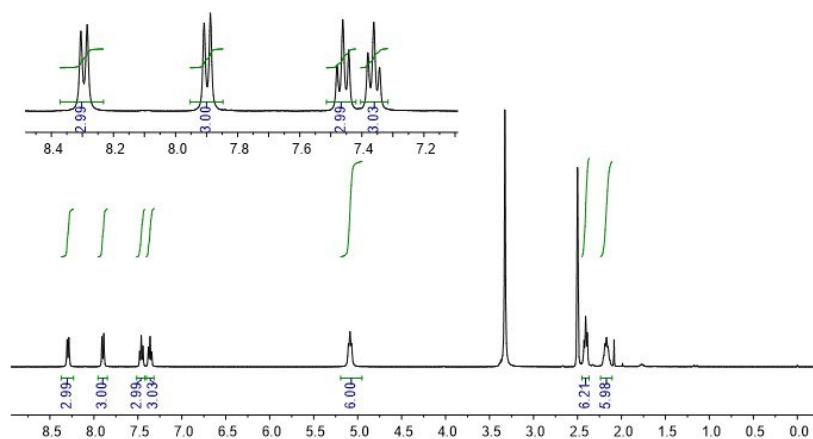

(B)

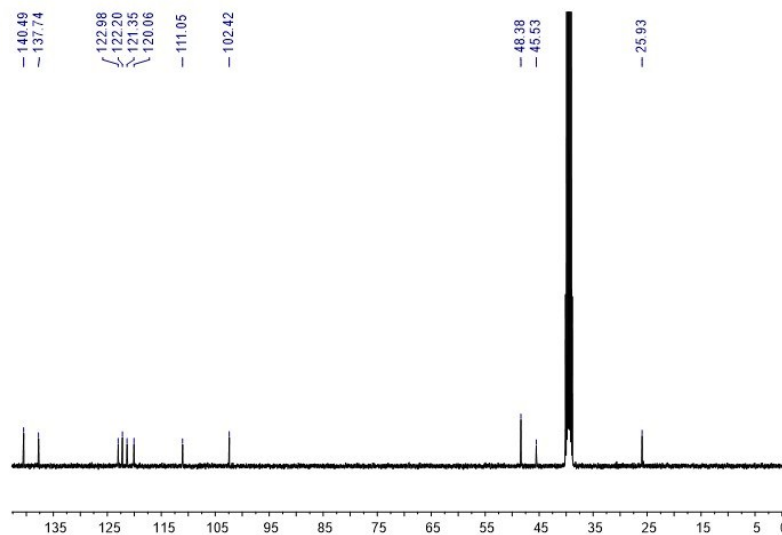

(C)

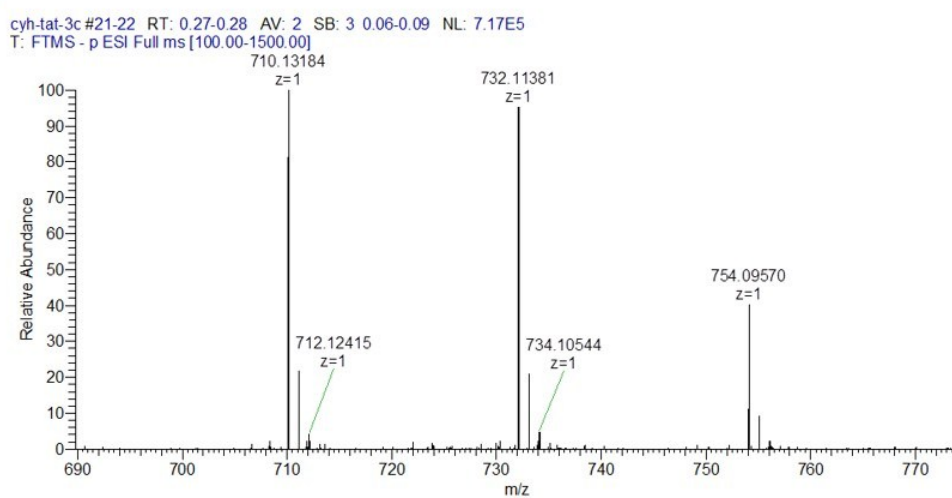

Fig. S7.  $^1\text{H}$  NMR (A),  $^{13}\text{C}$  NMR (B) and mass spectra (C) of TAT-3C.



(A)

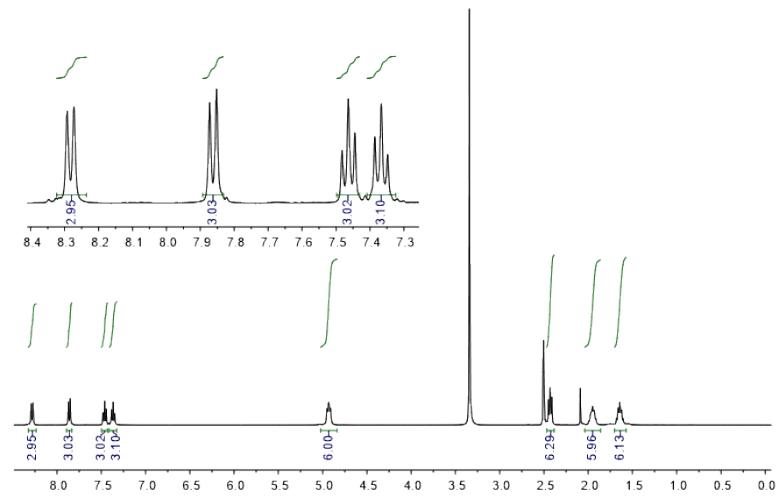

(B)

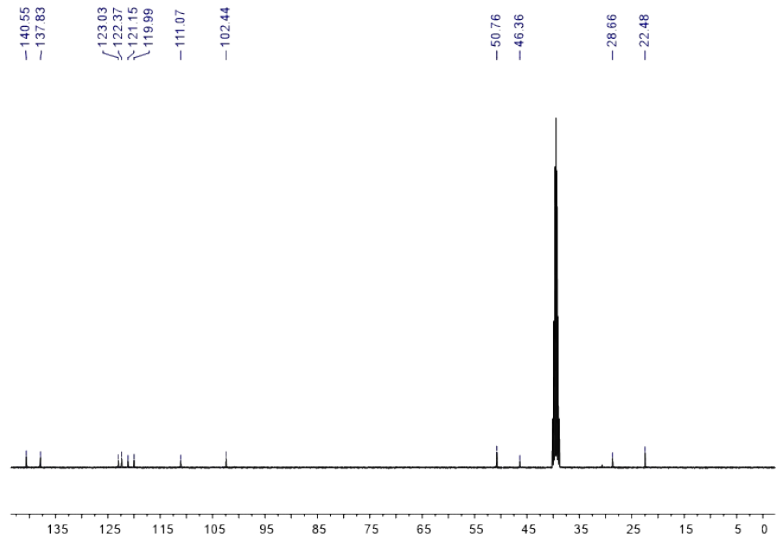

(C)

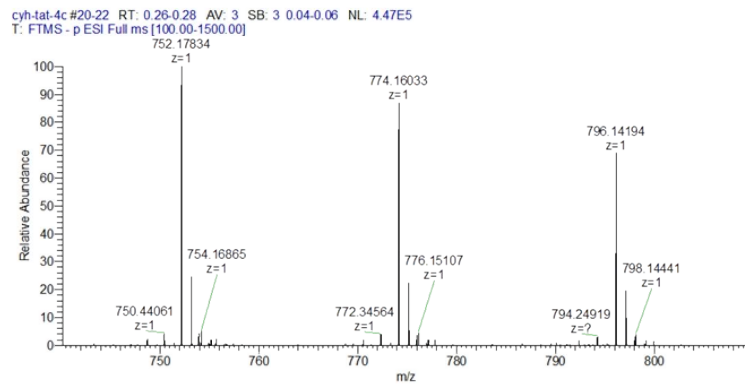

Fig. S8. <sup>1</sup>H NMR (A), <sup>13</sup>C NMR (B) and mass spectra (C) of TAT-4C.

(A)

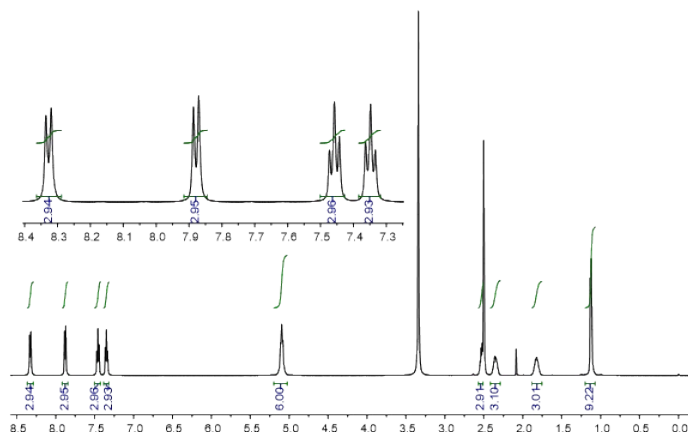

(B)

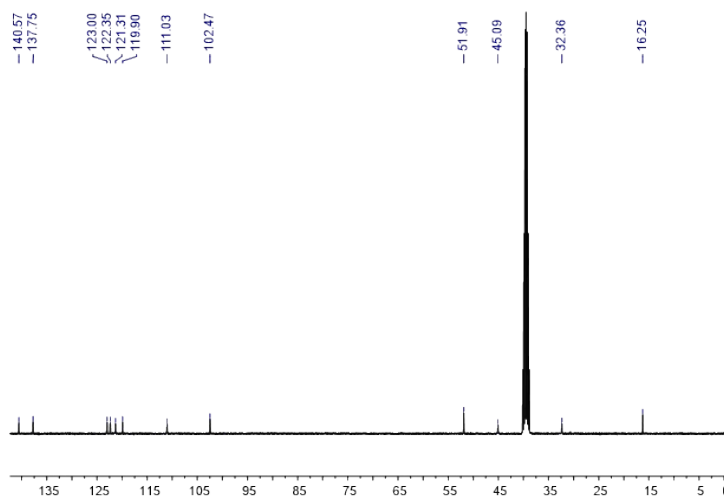

(C)

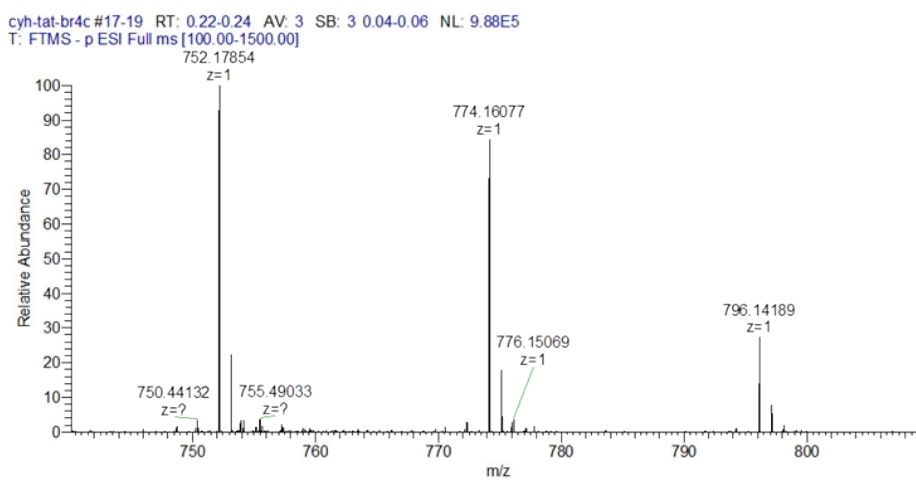

Fig. S9. <sup>1</sup>H NMR (A), <sup>13</sup>C NMR (B) and mass spectra (C) of TAT-br4C.



Table S1. EL performance of the OLEDs based on different hole injection layers with different thickness.

| Hole injection layer | Thickness (nm) | V <sub>on</sub> (V) | Max performance |             | Device performance at 10000 cd m <sup>-2</sup> |             |             |
|----------------------|----------------|---------------------|-----------------|-------------|------------------------------------------------|-------------|-------------|
|                      |                |                     | LE (cd/A)       | PE (lm/W)   | V (V)                                          | LE (cd/A)   | PE (lm/W)   |
| <b>PEDOT:PSS</b>     | <b>25</b>      | <b>2.7</b>          | <b>37.6</b>     | <b>35.1</b> | <b>6.3</b>                                     | <b>24.5</b> | <b>12.2</b> |
| <b>TAT-3C</b>        | <b>1.5</b>     | <b>2.8</b>          | <b>33.7</b>     | <b>28.7</b> | <b>6.3</b>                                     | <b>28.8</b> | <b>14.8</b> |
|                      | <b>3.1</b>     | <b>2.7</b>          | <b>34.7</b>     | <b>32.1</b> | <b>5.9</b>                                     | <b>29.1</b> | <b>15.5</b> |
|                      | <b>4.9</b>     | <b>2.9</b>          | <b>34.1</b>     | <b>28.0</b> | <b>6.1</b>                                     | <b>29.7</b> | <b>14.9</b> |
|                      | <b>8.3</b>     | <b>3.1</b>          | <b>27.6</b>     | <b>22.1</b> | <b>6.9</b>                                     | <b>25.0</b> | <b>11.4</b> |
| <b>TAT-4C</b>        | <b>1.6</b>     | <b>2.8</b>          | <b>33.9</b>     | <b>28.8</b> | <b>6.1</b>                                     | <b>28.7</b> | <b>14.8</b> |
|                      | <b>2.9</b>     | <b>2.7</b>          | <b>38.8</b>     | <b>39.2</b> | <b>6.1</b>                                     | <b>27.7</b> | <b>14.4</b> |
|                      | <b>5.0</b>     | <b>2.9</b>          | <b>35.3</b>     | <b>29.4</b> | <b>6.3</b>                                     | <b>30.8</b> | <b>15.3</b> |
|                      | <b>8.5</b>     | <b>3.0</b>          | <b>29.6</b>     | <b>23.3</b> | <b>7.0</b>                                     | <b>26.7</b> | <b>12.2</b> |
| <b>TAT-br4C</b>      | <b>1.7</b>     | <b>2.8</b>          | <b>31.9</b>     | <b>27.3</b> | <b>6.1</b>                                     | <b>27.6</b> | <b>14.1</b> |
|                      | <b>2.6</b>     | <b>2.7</b>          | <b>31.6</b>     | <b>29.8</b> | <b>6.0</b>                                     | <b>27.1</b> | <b>14.2</b> |
|                      | <b>4.9</b>     | <b>3.0</b>          | <b>25.9</b>     | <b>15.7</b> | <b>6.7</b>                                     | <b>25.3</b> | <b>11.8</b> |
|                      | <b>8.3</b>     | <b>3.4</b>          | <b>21.8</b>     | <b>11.5</b> | <b>7.3</b>                                     | <b>21.0</b> | <b>9.0</b>  |
